# Supplementary material for: Anti-Inflammatory Properties of Bellevalia saviczii Root Extract and Its Isolated Homoisoflavonoid (Dracol) Are Mediated by Modification on Calcium Signaling
Source: MDPI journal article supplement (doi:10.3390/molecules24183376), 2019-09-17
Supplement: s1 [file s1]

## Supplementary Material 1 (S1):

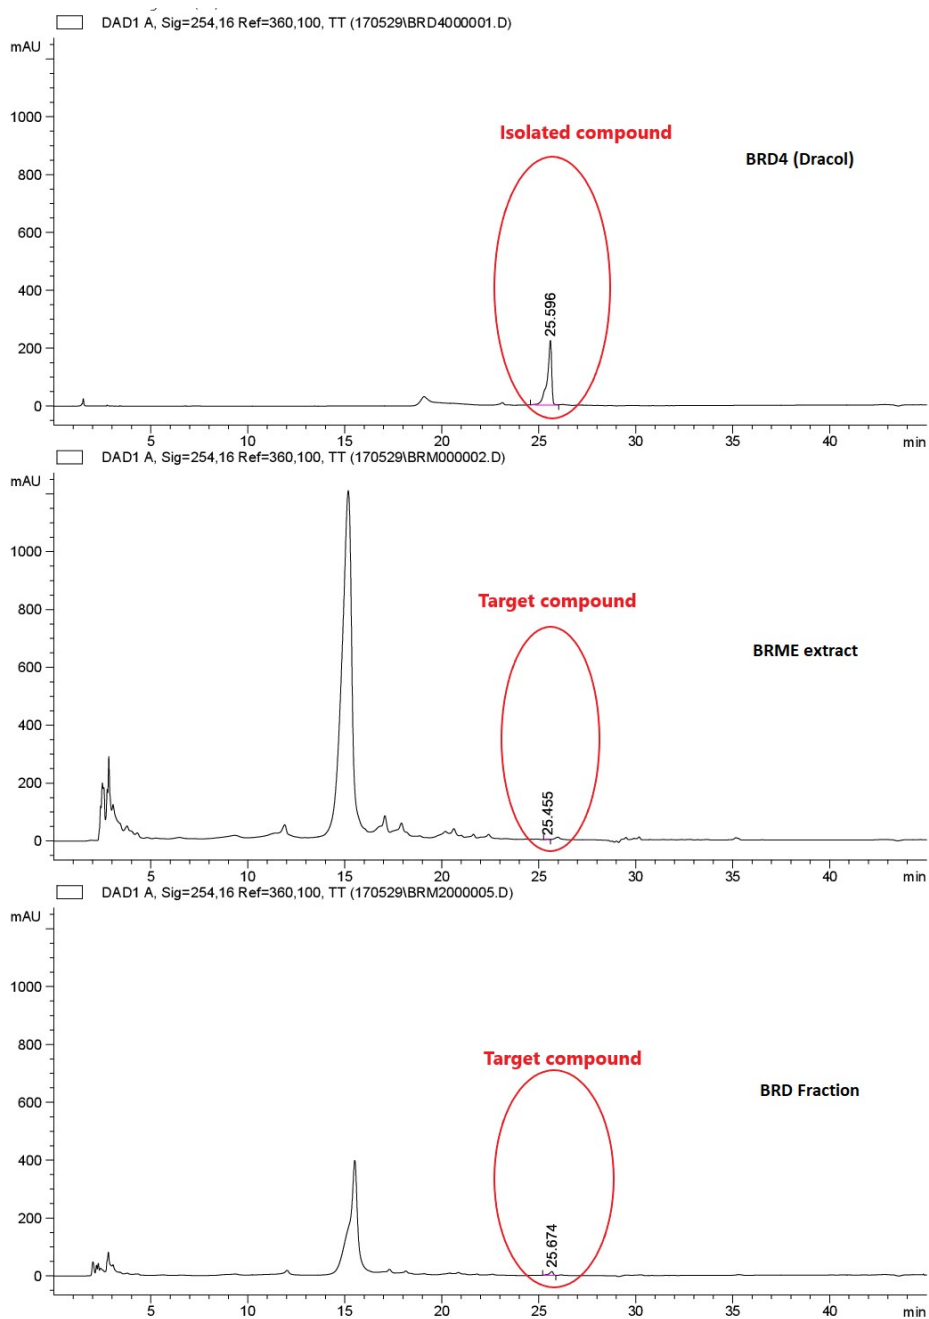

HPLC Fractionation and Isolation of homoisoflavonoid (*Dracol*) isolated from *B. saviczii* roots.

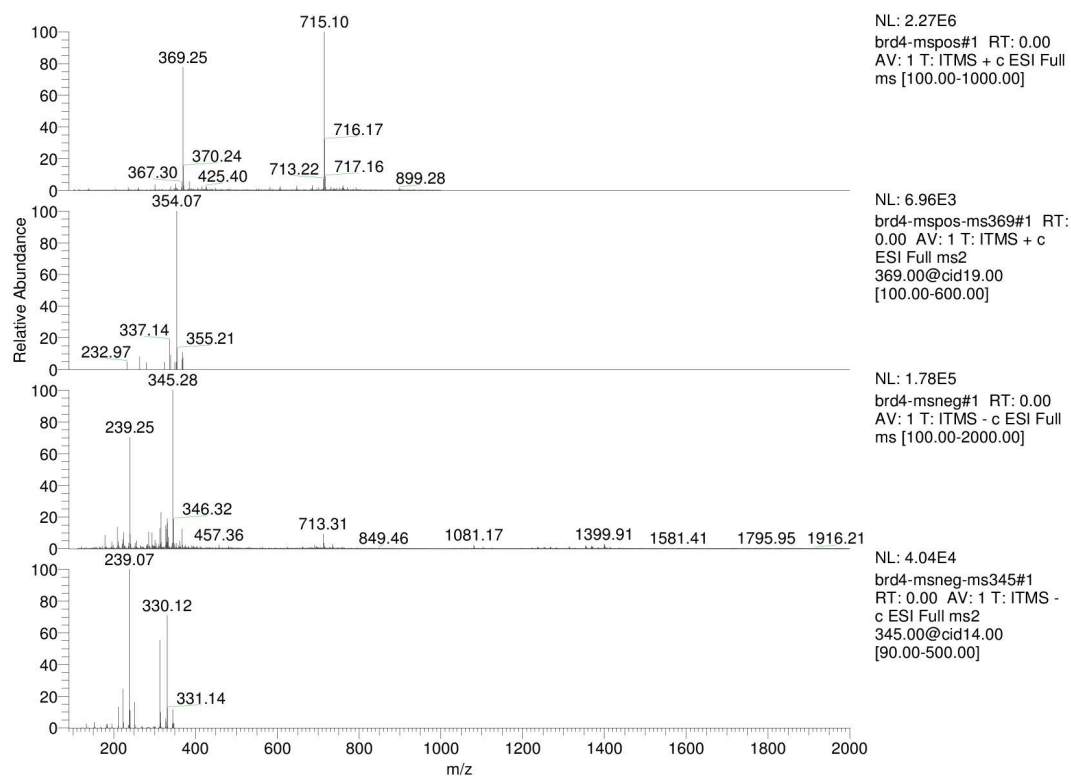

Mass spectra of homoisoflavonoid (*Dracol*) isolated from *B. saviczii* roots.

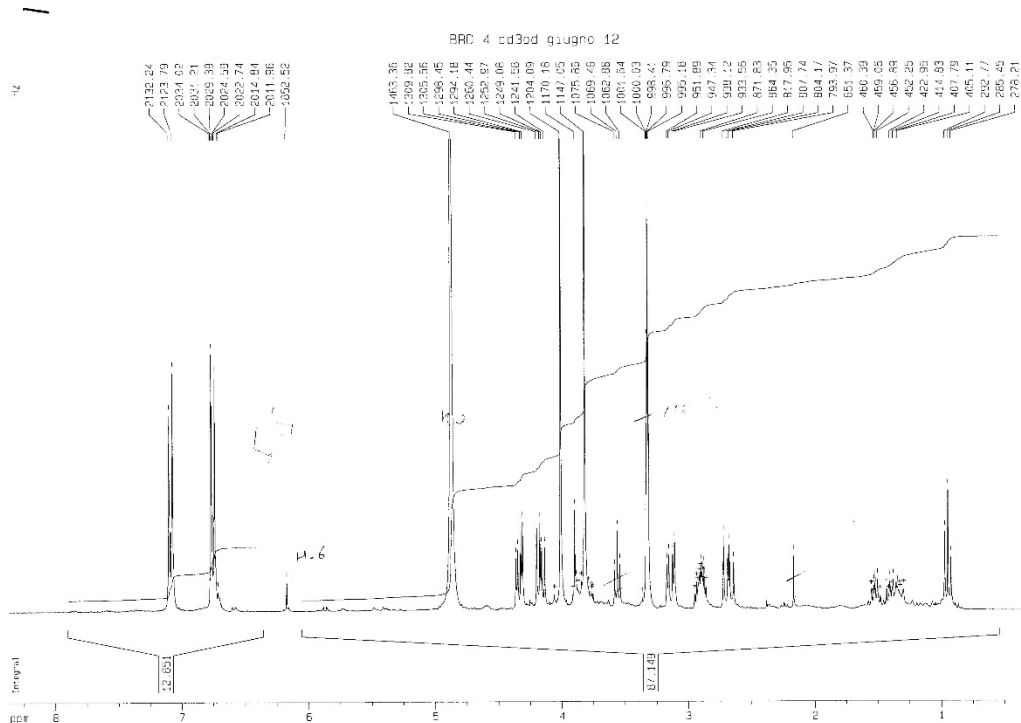

<sup>1</sup>H NMR spectrum of homoisoflavonoid (*Dracol*) isolated from *B. saviczii* roots.

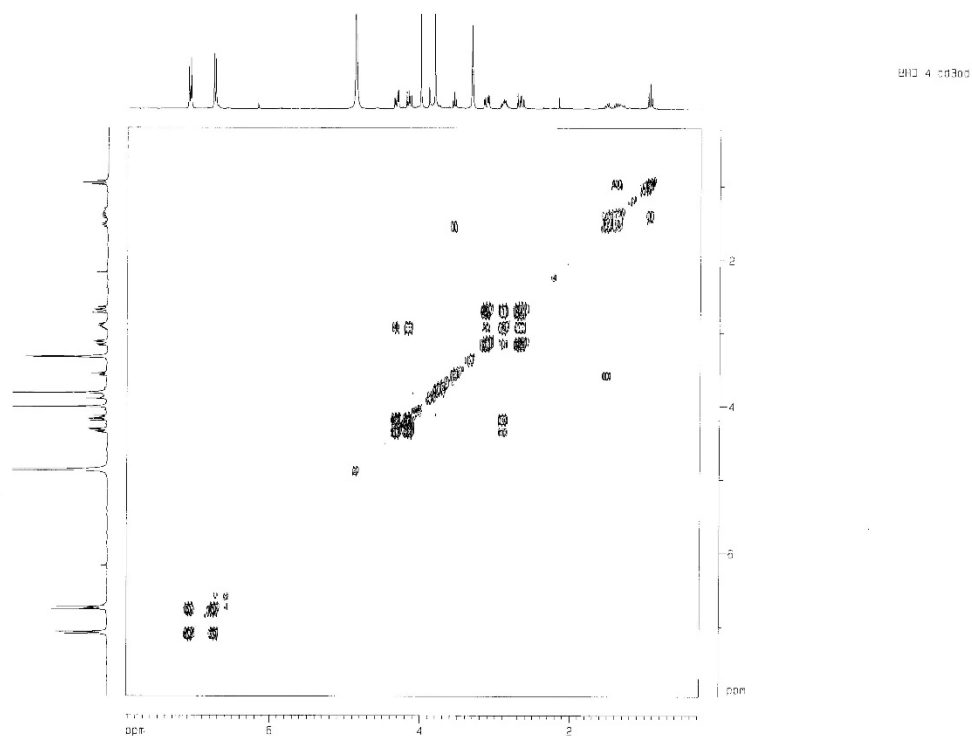

$^1\text{H}$ NMR-COSY spectrum of homoisoflavonoid (*Dracol*) isolated from *B. saviczii* roots.

## NF-kB activation with *Dracol* and BRME

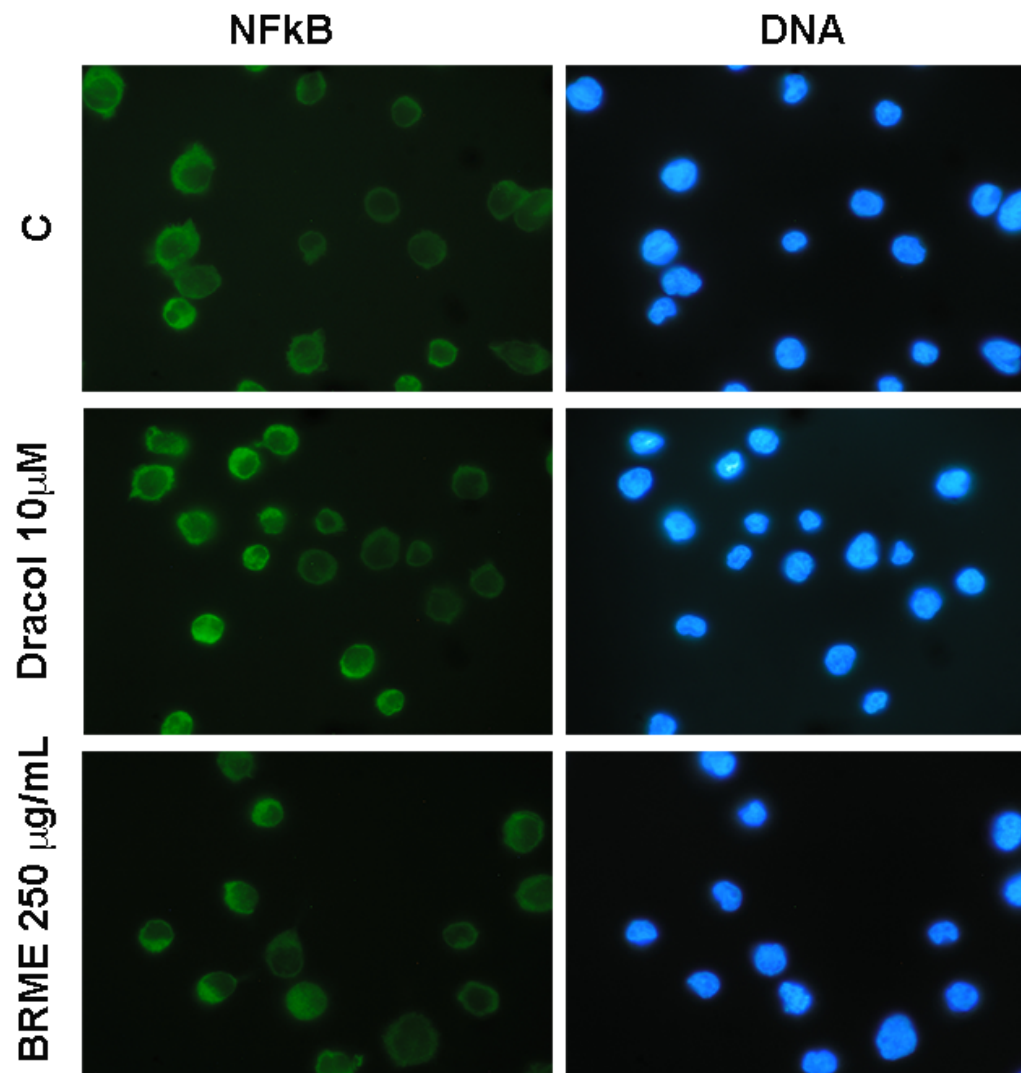

Representative images of NF-kB activation with *Dracol* and BRME alone.

## NF- $\kappa$ B activation with *Dracol* and BRME

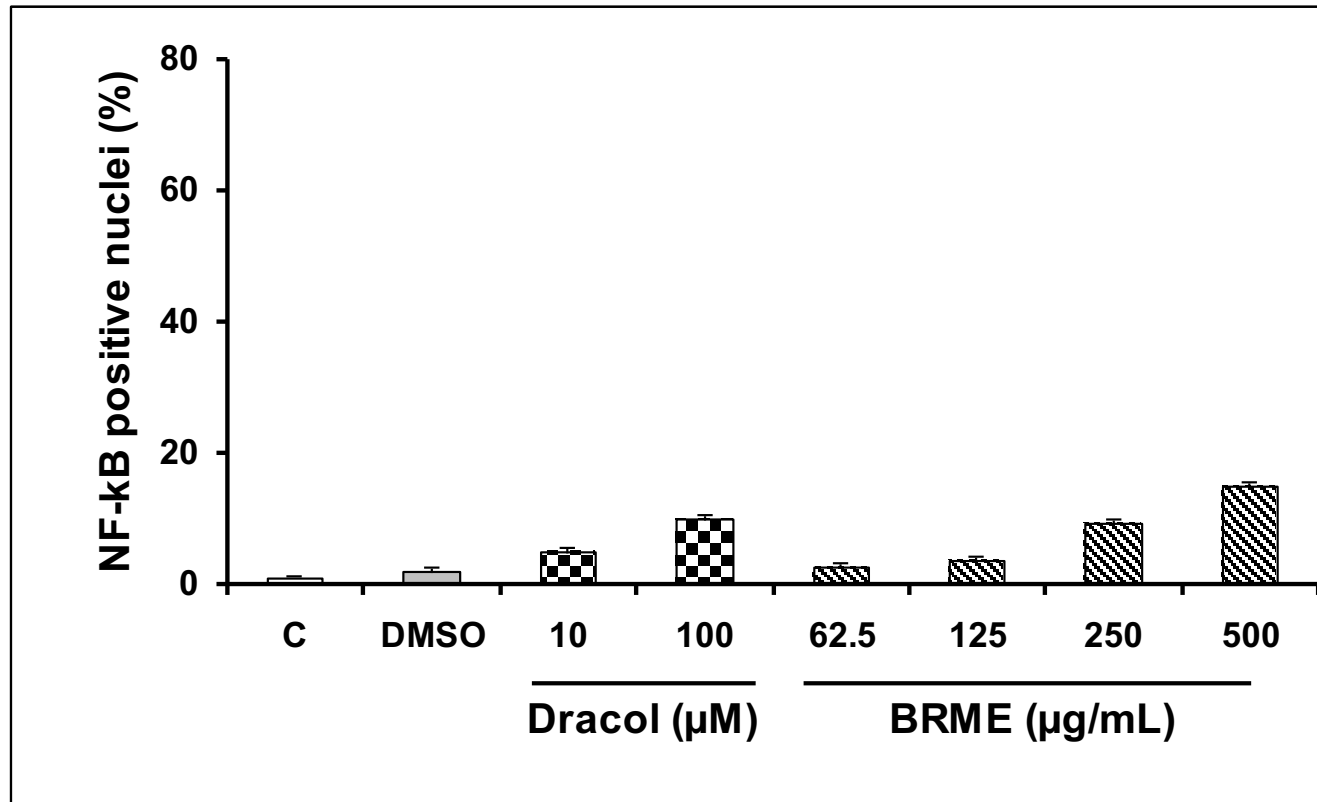

Quantitative analysis of NF- $\kappa$ B activation with *Dracol* and BRME alone obtained by immunofluorescence microscopy. Values referred to NF $\kappa$ B activation are low and comparable to control and DMSO samples.

# Representative image of Western Blot of NF-kB activation with Dracol and BRME alone and relative quantitative analysis

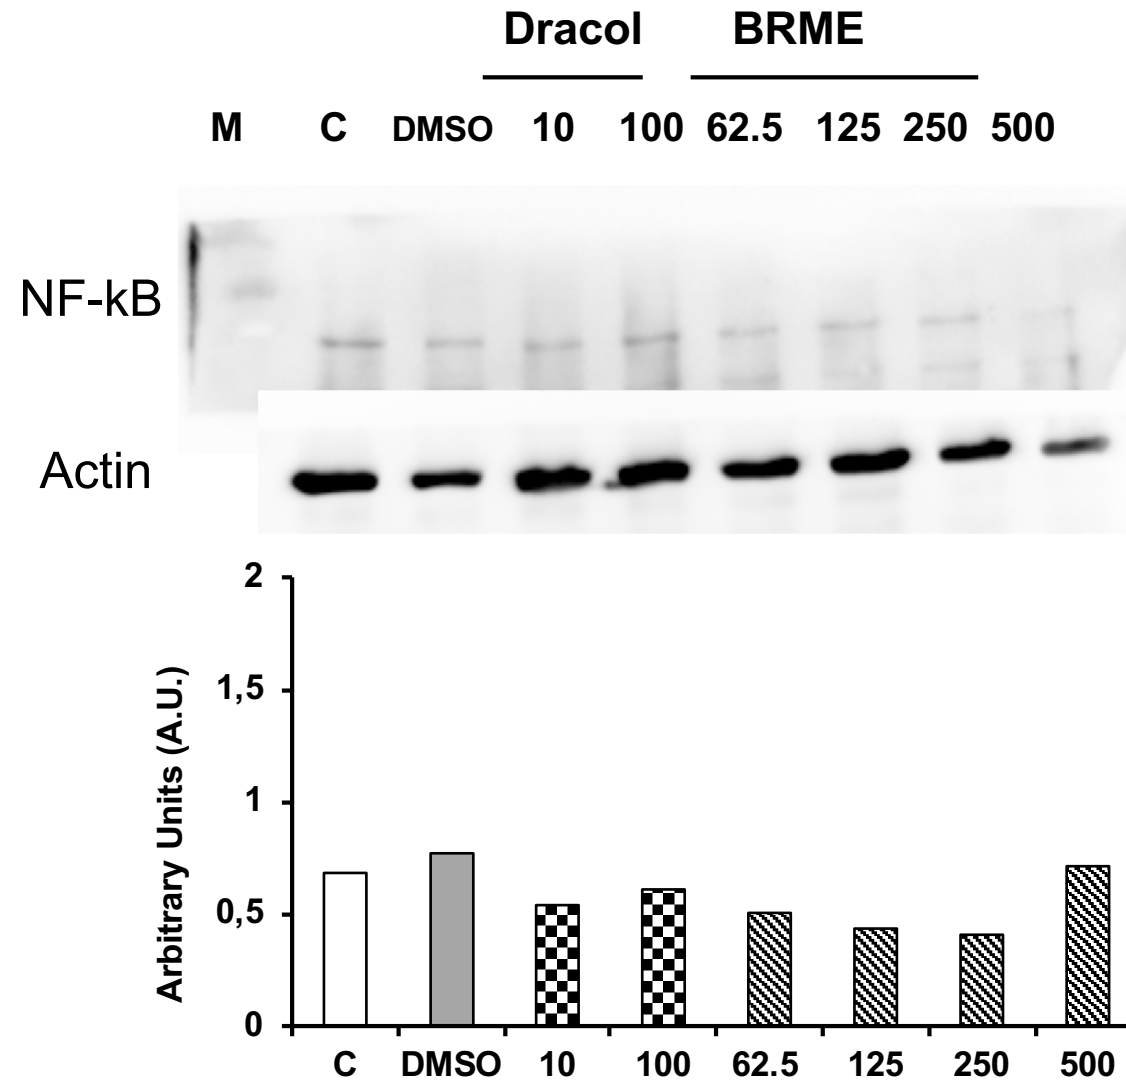

NF-kB values are low and comparable to control and DMSO samples.

## TNF $\alpha$ levels with *Dracol* and BRME

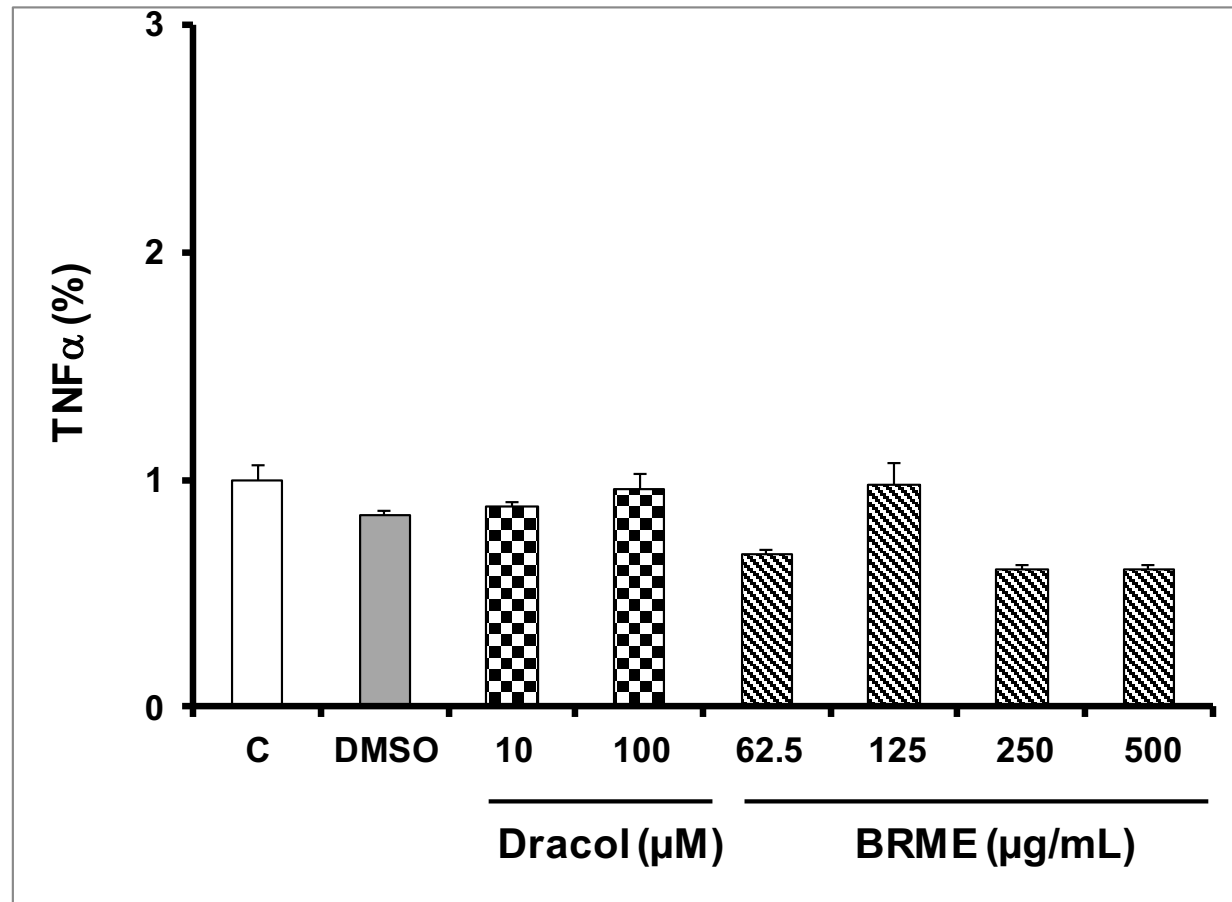

TNF $\alpha$  levels released by THP1, evaluated by ELISA, after treatment with *Dracol* and BRME alone. TNF $\alpha$  values are low and comparable to control and DMSO samples.

## IL6 levels with *Dracol* and BRME

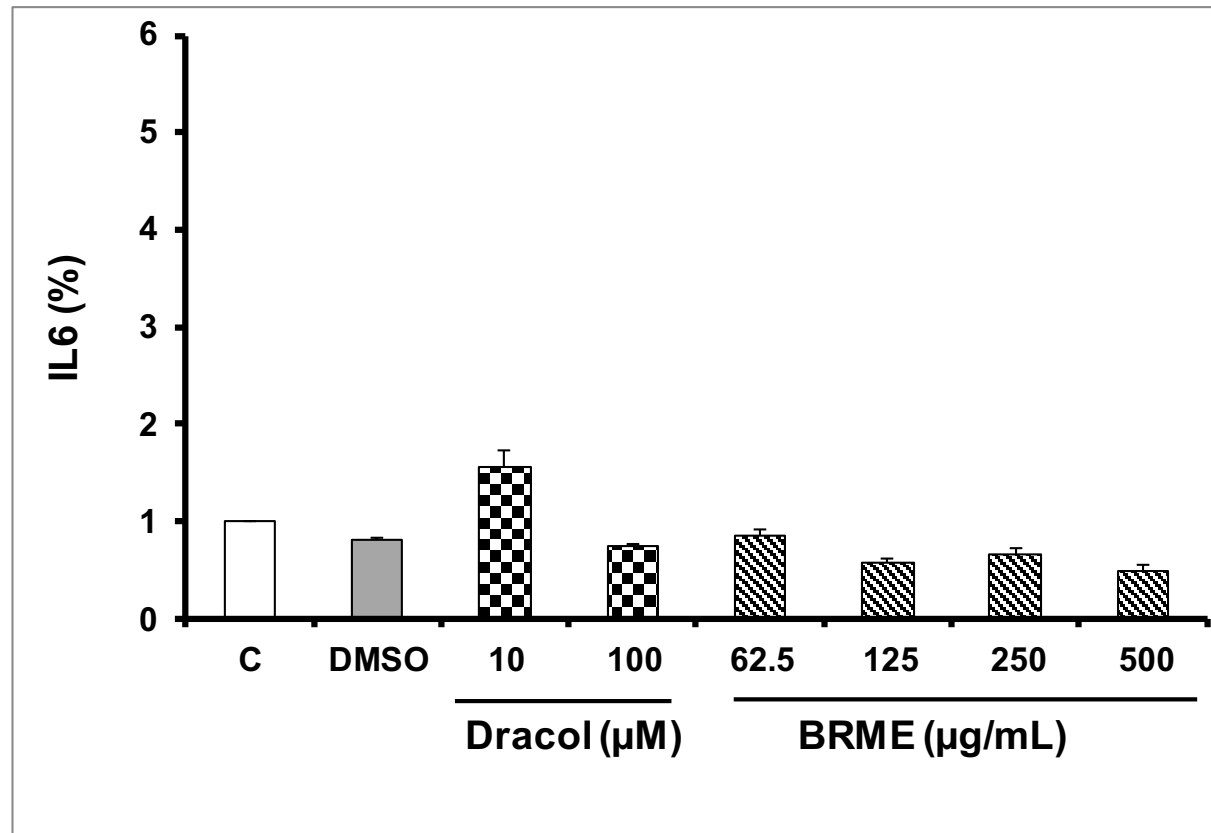

IL6 levels released by THP1, evaluated by ELISA, after treatment with *Dracol* and BRME alone. IL6 values are low and comparable to control and DMSO samples.



## IL1 $\beta$ levels with *Dracol* and BRME alone

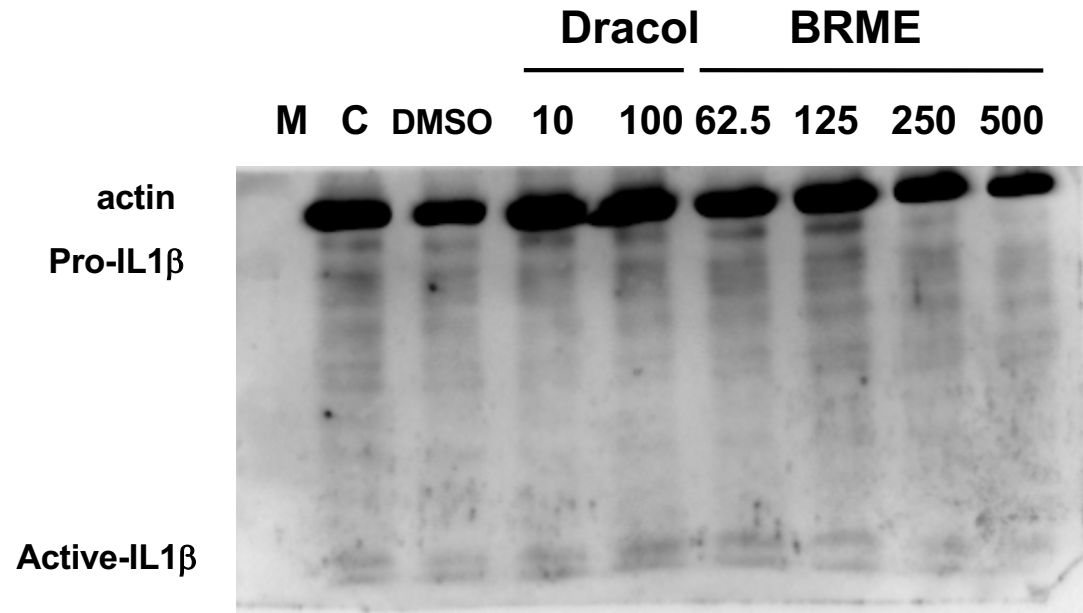

As expected, the absence of LPS did not induce IL1 $\beta$  expression.

THP1 death rate (%) evaluated by Trypan blue exclusion test after treatment  
with 200  $\mu$ M *Dracol* and 1000  $\mu$ g/mL BRME alone for different days

| Trypan Blue (%)        | 24 h | 48 h | 72 h | 96 h |
|------------------------|------|------|------|------|
| C                      | 2    | 3    | 3    | 4    |
| Dracol (200 $\mu$ M)   | 7    | 5    | 7    | 8    |
| BRME (1000 $\mu$ g/mL) | 6    | 10   | 5    | 5    |

## Supplementary material 3 (S3):

### BAPTA reduced LPS-induced p65 NF- $\kappa$ B nuclear translocation

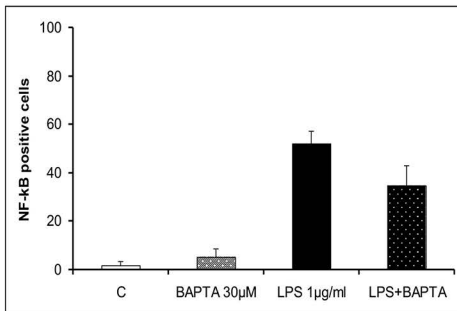

Pre-incubating THP-1 cells with BAPTA (a membrane-permeable buffer of intracellular  $\text{Ca}^{2+}$ ) attenuated p65 NF- $\kappa$ B nuclear translocation in the presence of LPS, thereby confirming the requirement for  $\text{Ca}^{2+}$  oscillations in this process.

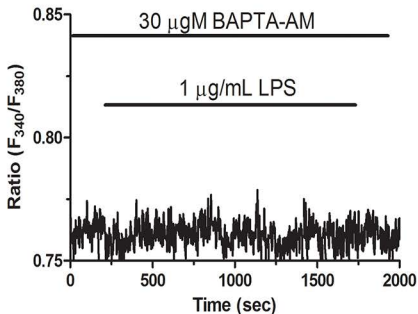

$\text{Ca}^{2+}$  oscillations in the presence of BAPTA and LPS
